# Supplementary material
Source: publisher site journal article supplement (https://www.dovepress.com/article/242032)
Supplement: Supplementary file 1 [file get_supplementary_file.php]

**Figure Legends**

**Figure S1** 1H NMR spectra of Boc-OTs (A), PEOz (B), PEOz-PLA (C), PEOz-PLA-A (D), PEOz-PLA-PBAEs (E), and PBAE-ART (F). CDCl3 was used as solvent.

**Figure S2** The CMC values of the PEOz-PLA-PBAEs copolymer micelles.

**Figure S3** The diameters of ART conjugated PBAEs prodrug micelles, as determined by laser light scattering. The inset images exhibited the morphologies of the micelles captured by TEM. Scale bar 100 nm.

**Figure S4** The variation of the size (A) and zeta potential (B) of ART conjugated polymer prodrugs incubated at different pH values.

**Figure S5** The stability of ART conjugated PBAEs prodrug micelles incubated in PBS (pH 7.4) at 37 °C for 96 h. (n=3).

**Figure S6** *In vitro* drug release profile of ART-conjugated copolymer micelles in PBS at pH 7.4 and 6.0 (n=3).

**Figure S7** The *in vitro* anti-proliferation effects of PBAE-ART4 and PBAE-ART2 copolymer micelles against CT-26 cancer cells at different concentrations, respectively. The results represent mean ± SD (n = 3).

**Figure S8** Acid-base titration curves of PEOz-PLA-PBAEs copolymers.
